# Supplementary material for: Unsaturated Dinitriles Formation Routes in Extraterrestrial Environments: A Combined Experimental and Theoretical Investigation of the Reaction between Cyano Radicals and Cyanoethene (C2H3CN)
Source: PubMed Central journal article supplement (PMC9189926; doi:10.1021/acs.jpca.2c01802), 2022-05-31

# Unsaturated Dinitriles Formation Routes in Extraterrestrial Environments: A Combined Experimental and Theoretical Investigation of the Reaction Between Cyano Radicals and Cyanoethene (C<sub>2</sub>H<sub>3</sub>CN)

Demian Marchione,<sup>a</sup> Luca Mancini,<sup>a</sup> Pengxiao Liang,<sup>a</sup> Gianmarco Vanuzzo,<sup>a</sup>  
Fernando Pirania,<sup>a</sup> Dimitrios Skouteris,<sup>b</sup> Marzio Rosi,<sup>c</sup> Piergiorgio  
Casavecchia,<sup>a</sup> and Nadia Balucani <sup>\*,a</sup>

*a Dipartimento di Chimica, Biologia e Biotecnologie, Università degli studi di Perugia,  
06123 Perugia, Italy*

*b MASTER TEC, 06123 Perugia, Italy*

*c Dipartimento di Ingegneria Civile ed Ambientale, Università degli studi di Perugia,  
06123 Perugia, Italy*

The following data report the cartesian coordinates for all the stationary points identified in the Potential Energy Surface, including minima, transition states, reactants and possible products, evaluated at the B3LYP/aug-cc-pVTZ level of theory. Together with the xyz cartesian coordinates of all the stationary points, the geometries are reported including the values of bond distances (in Å, in black) and angles (in °, in red).

S1: Structures of the stationary points identified in the PES for the  $C_2H_3CN + CN$  reaction

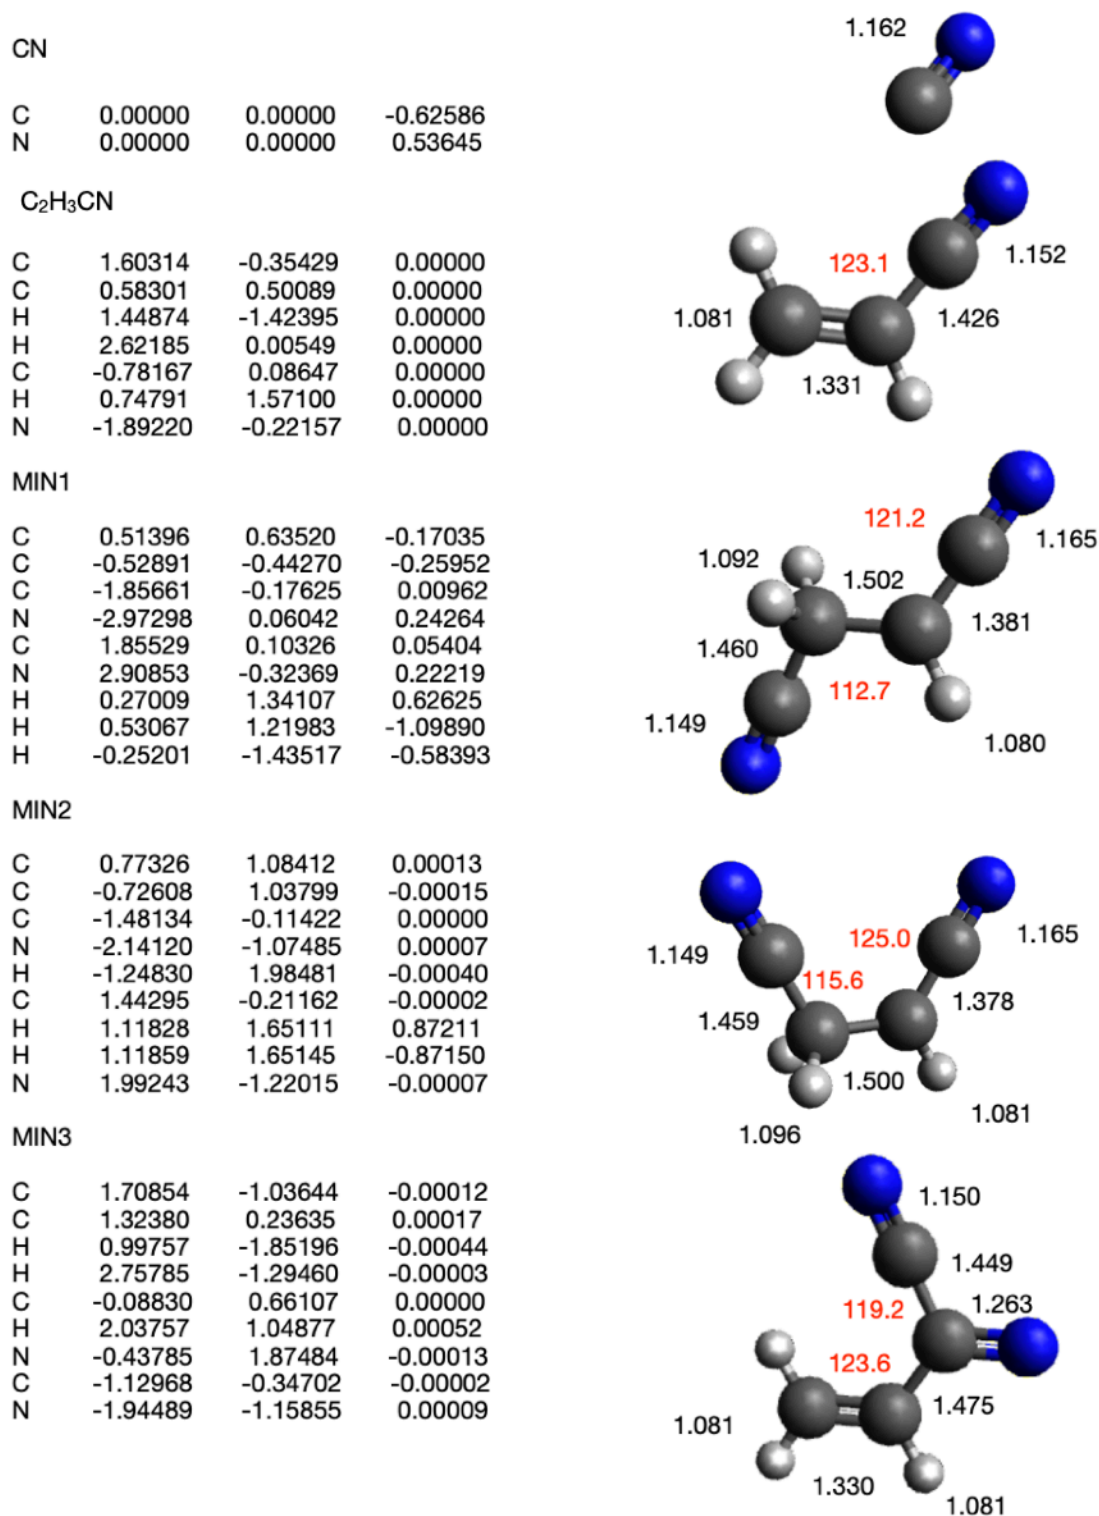

## MIN4

|   |          |          |          |
|---|----------|----------|----------|
| C | -0.04904 | 1.74215  | -0.21179 |
| C | -0.00089 | 0.37959  | 0.42596  |
| C | 1.22974  | -0.34779 | 0.08432  |
| N | 2.20948  | -0.88604 | -0.17769 |
| C | -1.19514 | -0.41182 | 0.06463  |
| N | -2.15481 | -0.97902 | -0.21369 |
| H | 0.45800  | 1.91850  | -1.14610 |
| H | -0.72890 | 2.47601  | 0.19036  |
| H | -0.01985 | 0.48806  | 1.51660  |

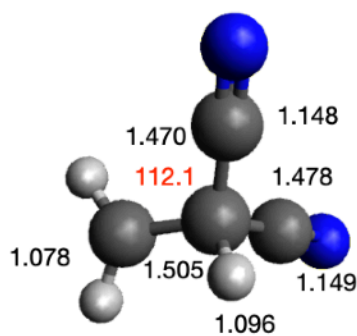

## MIN5

|   |          |          |          |
|---|----------|----------|----------|
| C | -2.68891 | 0.54470  | -0.01939 |
| C | -1.72812 | -0.43720 | -0.18574 |
| H | -2.43516 | 1.52932  | 0.34215  |
| H | -3.71827 | 0.33555  | -0.26163 |
| C | -0.40052 | -0.28398 | 0.00151  |
| H | -2.01367 | -1.41083 | -0.57404 |
| N | 0.70532  | -0.26876 | 0.53672  |
| C | 1.89075  | 0.05463  | 0.01797  |
| N | 2.97009  | 0.30833  | -0.30709 |

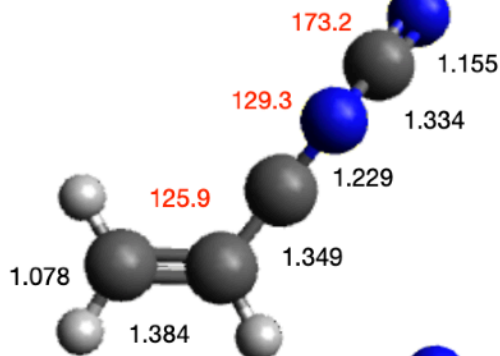

## TS1

|   |          |          |          |
|---|----------|----------|----------|
| C | 0.66007  | -1.32553 | -0.30408 |
| C | -0.10184 | -0.34801 | 0.55104  |
| C | -1.39243 | 0.12837  | 0.09715  |
| N | -2.42073 | 0.49082  | -0.26613 |
| C | 1.09340  | 0.35294  | 0.08054  |
| N | 1.96976  | 1.10841  | -0.16299 |
| H | 0.39271  | -1.43921 | -1.34127 |
| H | 1.29748  | -2.04705 | 0.17897  |
| H | -0.08868 | -0.55502 | 1.61826  |

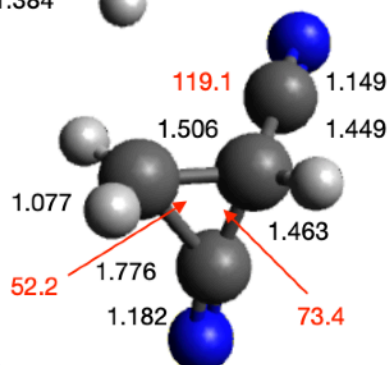

## TS2

|   |          |          |          |
|---|----------|----------|----------|
| C | -0.47390 | 0.41878  | 0.15338  |
| C | 0.50694  | -0.45624 | -0.16250 |
| C | 1.87891  | -0.14099 | -0.00923 |
| N | 3.00210  | 0.09451  | 0.10670  |
| C | -1.85087 | 0.05849  | 0.08176  |
| N | -2.96720 | -0.22285 | 0.04591  |
| H | -0.63882 | 1.68451  | -1.50442 |
| H | -0.24385 | 1.36421  | 0.62556  |
| H | 0.27176  | -1.43052 | -0.56980 |

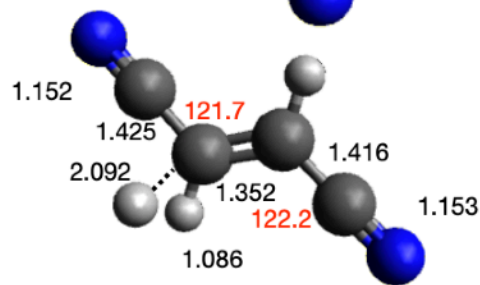

## TS3

|   |          |          |          |
|---|----------|----------|----------|
| C | 2.13291  | -0.32606 | 0.00000  |
| C | 1.38681  | 0.73849  | 0.00000  |
| H | 1.72692  | -1.33225 | -0.00000 |
| H | 3.21935  | -0.24117 | 0.00000  |
| C | -0.92081 | 0.60574  | 0.00000  |
| H | 1.50012  | 1.80892  | 0.00000  |
| N | -1.34564 | 1.69520  | 0.00000  |
| C | -0.96690 | -0.78025 | 0.00000  |
| N | -0.97413 | -1.93278 | 0.00000  |

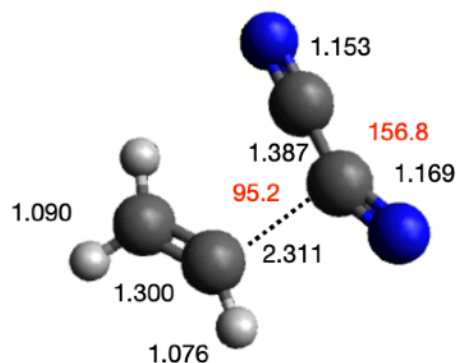

TS4

|   |          |          |          |
|---|----------|----------|----------|
| C | 0.70486  | 1.00889  | 0.28384  |
| C | -0.67956 | 0.93731  | -0.30279 |
| C | -1.54413 | -0.11161 | -0.05665 |
| N | -2.28092 | -0.98845 | 0.15287  |
| C | 1.51658  | -0.18266 | 0.03361  |
| N | 2.16293  | -1.11144 | -0.16520 |
| H | 0.64711  | 1.15546  | 1.36853  |
| H | 1.22805  | 1.87437  | -0.12208 |
| H | -1.03576 | 1.75786  | -0.90821 |

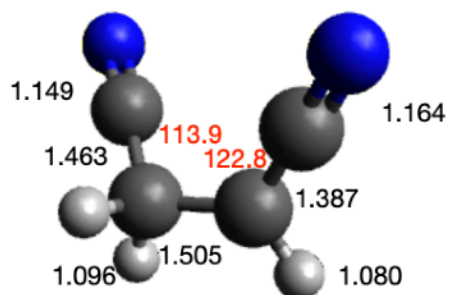

TS5

|   |          |          |          |
|---|----------|----------|----------|
| C | 1.25351  | -1.48294 | 0.00012  |
| C | 1.56890  | -0.19079 | -0.00016 |
| H | 0.22853  | -1.82397 | 0.00054  |
| H | 2.03603  | -2.22762 | -0.00007 |
| C | 0.63865  | 0.89462  | 0.00001  |
| H | 2.60179  | 0.13673  | -0.00057 |
| N | 0.13244  | 1.94666  | 0.00000  |
| C | -1.52668 | -0.03606 | 0.00049  |
| N | -2.48566 | -0.68868 | -0.00038 |

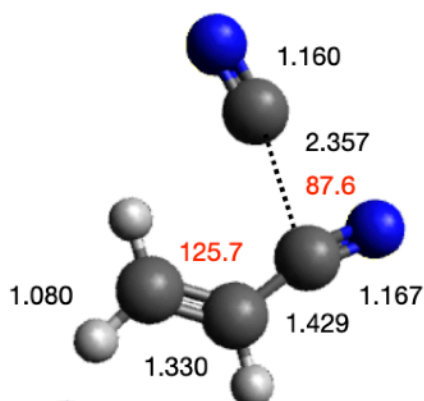

TS6

|   |          |          |          |
|---|----------|----------|----------|
| C | -0.67218 | 0.98688  | -0.10089 |
| C | 0.67942  | 1.01094  | -0.13623 |
| C | 1.50716  | -0.13012 | -0.00770 |
| N | 2.21751  | -1.03326 | 0.09240  |
| H | 1.18674  | 1.96004  | -0.24471 |
| C | -1.44743 | -0.20765 | -0.05131 |
| H | -1.22069 | 1.90160  | -0.27754 |
| H | -1.16033 | 1.48389  | 1.87131  |
| N | -2.10431 | -1.15329 | -0.03130 |

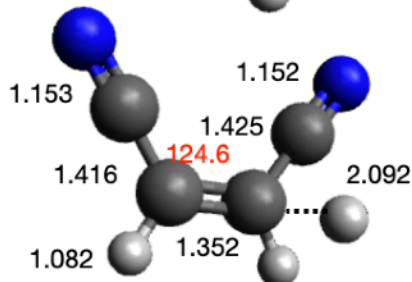

TS7

|   |          |          |          |
|---|----------|----------|----------|
| C | -0.89895 | -1.23377 | -0.06103 |
| C | 0.54980  | -1.26389 | 0.06591  |
| C | 0.81567  | 0.14464  | -0.07600 |
| N | 1.84435  | 0.87773  | -0.01565 |
| H | 1.20460  | -2.03822 | 0.43226  |
| C | -0.64435 | 0.53349  | -0.02839 |
| N | -1.45897 | 1.40624  | 0.09970  |
| H | -1.52560 | -1.77357 | 0.64596  |
| H | -1.30968 | -1.25880 | -1.06948 |

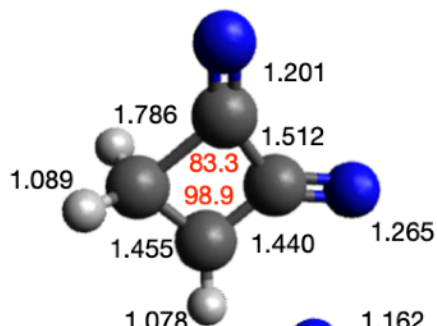

TS8

|   |          |          |          |
|---|----------|----------|----------|
| C | 0.77696  | 1.64089  | -0.33228 |
| C | 1.36121  | 0.67853  | 0.38149  |
| C | 1.28480  | -0.70288 | 0.03225  |
| N | 1.22275  | -1.82619 | -0.22063 |
| C | -1.87519 | -0.33256 | 0.15041  |
| N | -2.97759 | 0.01051  | 0.01920  |
| H | 0.22062  | 1.42561  | -1.23334 |
| H | 0.85113  | 2.67388  | -0.02490 |
| H | 1.92539  | 0.90633  | 1.27705  |

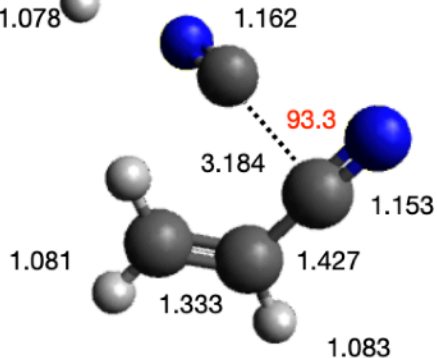

TS9

|   |          |          |          |
|---|----------|----------|----------|
| C | 0.00002  | 1.73992  | -0.10645 |
| C | 0.00001  | 0.39346  | 0.08233  |
| C | 1.22604  | -0.35808 | -0.00812 |
| N | 2.21133  | -0.94416 | -0.10030 |
| C | -1.22602 | -0.35808 | -0.00812 |
| N | -2.21130 | -0.94416 | -0.10036 |
| H | 0.92975  | 2.28508  | -0.15948 |
| H | -0.92970 | 2.28510  | -0.15945 |
| H | -0.00049 | 0.14479  | 1.96570  |

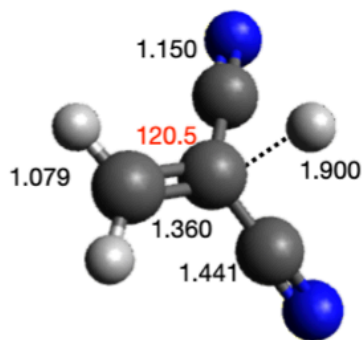

TS10

|   |          |          |          |
|---|----------|----------|----------|
| C | 2.29210  | -0.72923 | 0.00000  |
| C | 1.55043  | 0.37967  | -0.00001 |
| H | 1.83302  | -1.70823 | 0.00002  |
| H | 3.37157  | -0.67949 | -0.00001 |
| C | 0.11687  | 0.33601  | 0.00000  |
| H | 1.99686  | 1.37124  | -0.00003 |
| N | -0.84728 | 1.16665  | 0.00001  |
| C | -1.49321 | -0.07495 | 0.00000  |
| N | -2.29537 | -0.94558 | -0.00001 |

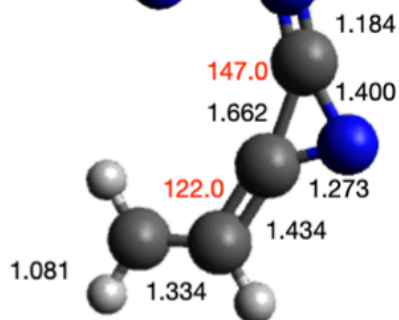

E-NC-CH=CH-CN

|   |          |          |          |
|---|----------|----------|----------|
| C | -0.48638 | 0.46058  | -0.00038 |
| C | 0.48638  | -0.46058 | -0.00038 |
| C | 1.86375  | -0.11174 | 0.00008  |
| N | 2.98774  | 0.14250  | 0.00034  |
| C | -1.86375 | 0.11174  | 0.00008  |
| N | -2.98775 | -0.14250 | 0.00034  |
| H | -0.25467 | 1.51772  | -0.00060 |
| H | 0.25467  | -1.51772 | -0.00060 |

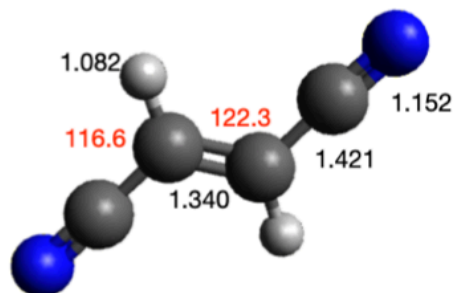

Z-NC-CH=CH-CN

|   |          |          |          |
|---|----------|----------|----------|
| C | 0.67014  | 1.03479  | 0.00167  |
| C | -0.66998 | 1.03475  | -0.00168 |
| C | -1.47665 | -0.13457 | -0.00130 |
| N | -2.17125 | -1.05395 | 0.00152  |
| C | 1.47683  | -0.13450 | 0.00115  |
| N | 2.17096  | -1.05422 | -0.00143 |
| H | -1.20131 | 1.97713  | -0.00390 |
| H | 1.20139  | 1.97725  | 0.00418  |

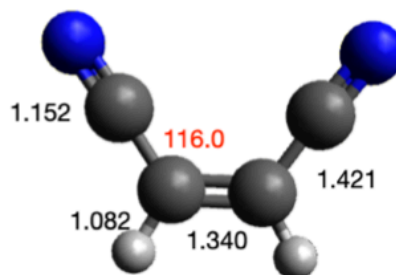

CH<sub>2</sub>C(CN)<sub>2</sub>

|   |          |          |          |
|---|----------|----------|----------|
| C | -0.00227 | 1.74281  | -0.00013 |
| C | 0.00010  | 0.40416  | 0.00028  |
| C | -1.21981 | -0.34986 | 0.00004  |
| N | -2.20166 | -0.95007 | -0.00010 |
| C | 1.22199  | -0.34655 | 0.00010  |
| N | 2.20257  | -0.94867 | -0.00012 |
| H | -0.93159 | 2.29238  | -0.00005 |
| H | 0.92520  | 2.29549  | -0.00016 |

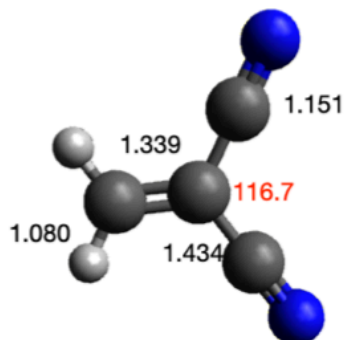

TS-iso

|   |          |          |          |
|---|----------|----------|----------|
| C | 0.71075  | 0.59437  | -0.60697 |
| C | -0.44830 | 0.77891  | 0.24185  |
| H | 1.32055  | 1.47412  | -0.75798 |
| H | 0.53630  | 0.05404  | -1.52705 |
| H | -0.41026 | 1.49892  | 1.04709  |
| C | -1.59777 | 0.01274  | 0.10348  |
| N | -2.57041 | -0.61160 | -0.01896 |
| N | 1.78107  | -0.94502 | -0.13040 |
| C | 2.01511  | -0.07448 | 0.64223  |

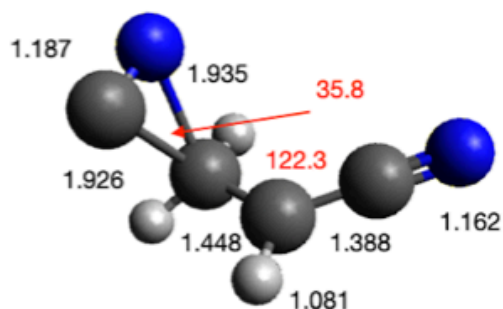

NCCN

|   |         |         |          |
|---|---------|---------|----------|
| C | 0.00000 | 0.00000 | 0.68786  |
| N | 0.00000 | 0.00000 | 1.84006  |
| C | 0.00000 | 0.00000 | -0.68786 |
| N | 0.00000 | 0.00000 | -1.84006 |

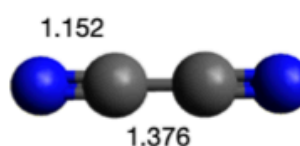

CH<sub>2</sub>CH

|   |          |          |          |
|---|----------|----------|----------|
| C | 0.58557  | 0.02928  | 0.00007  |
| C | -0.70447 | -0.14161 | -0.00004 |
| H | 1.03472  | 1.02353  | -0.00016 |
| H | 1.28054  | -0.80503 | -0.00011 |
| H | -1.60186 | 0.45547  | 0.00007  |

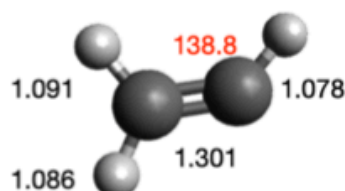

CH<sub>2</sub>C(N)CCN

|   |          |          |          |
|---|----------|----------|----------|
| C | 2.28621  | -0.68738 | -0.00001 |
| C | 1.14857  | -0.03103 | 0.00002  |
| H | 2.29687  | -1.76648 | -0.00000 |
| H | 3.22587  | -0.15497 | -0.00005 |
| C | -0.22862 | 0.22394  | 0.00001  |
| N | 0.51526  | 1.26893  | -0.00001 |
| C | -1.58944 | -0.12326 | 0.00001  |
| N | -2.68999 | -0.46495 | -0.00001 |

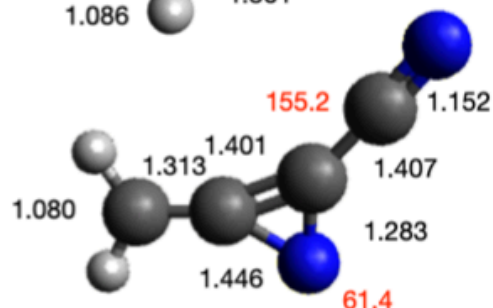

HCCN

|   |          |          |         |
|---|----------|----------|---------|
| C | -0.06935 | -1.27358 | 0.00000 |
| C | 0.00000  | 0.09212  | 0.00000 |
| N | 0.21709  | 1.24600  | 0.00000 |
| H | -1.10348 | -1.63326 | 0.00000 |

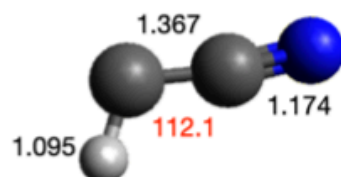

CH<sub>2</sub>CN

|   |          |          |          |
|---|----------|----------|----------|
| C | 0.00024  | -1.18907 | 0.00000  |
| C | 0.00000  | 0.18727  | 0.00000  |
| N | -0.00027 | 1.35325  | 0.00000  |
| H | 0.00025  | -1.73099 | 0.93324  |
| H | 0.00025  | -1.73099 | -0.93324 |

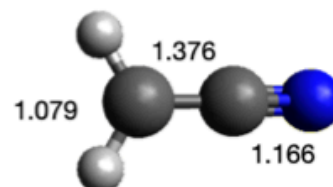

S2: Structures of the stationary points identified in the PES for the  $C_2H_3CN + NC$  reaction

MIN6

|   |          |          |          |
|---|----------|----------|----------|
| C | -0.85682 | 1.01071  | 0.00019  |
| C | 0.64033  | 1.04832  | -0.00020 |
| C | 1.45362  | -0.06261 | -0.00012 |
| N | 2.16170  | -0.98822 | 0.00016  |
| N | -1.40992 | -0.29241 | 0.00000  |
| C | -1.88765 | -1.35678 | -0.00014 |
| H | -1.23229 | 1.55080  | 0.87599  |
| H | -1.23273 | 1.55126  | -0.87512 |
| H | 1.10572  | 2.02452  | -0.00046 |

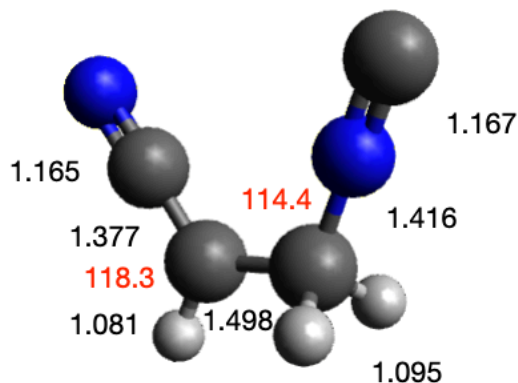

MIN7

|   |          |          |          |
|---|----------|----------|----------|
| C | 0.11524  | 1.72171  | -0.20897 |
| C | 0.05743  | 0.35747  | 0.40759  |
| H | -0.78622 | 2.30884  | -0.27340 |
| H | 1.07355  | 2.13727  | -0.47302 |
| C | -1.19602 | -0.33959 | 0.05800  |
| N | -2.19592 | -0.84434 | -0.19412 |
| N | 1.18974  | -0.43738 | 0.05386  |
| C | 2.13880  | -1.05932 | -0.21933 |
| H | 0.06335  | 0.44427  | 1.50456  |

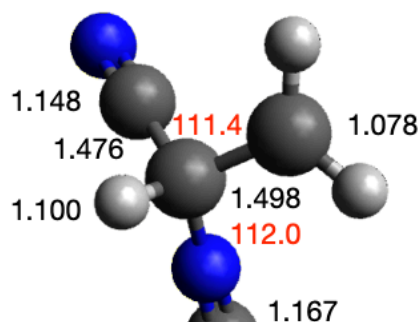

MIN8

|   |          |          |          |
|---|----------|----------|----------|
| C | -0.54935 | 0.61503  | 0.12608  |
| C | 0.48930  | -0.46591 | 0.17410  |
| C | 1.82679  | -0.17550 | -0.00771 |
| N | 2.95098  | 0.08409  | -0.16594 |
| N | -1.85658 | 0.08759  | -0.04250 |
| C | -2.93084 | -0.34601 | -0.17706 |
| H | -0.33845 | 1.31352  | -0.68663 |
| H | -0.53013 | 1.19866  | 1.05354  |
| H | 0.19242  | -1.47964 | 0.39974  |

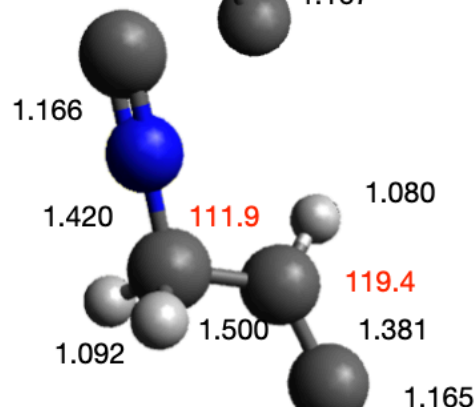

TS12

|   |          |          |          |
|---|----------|----------|----------|
| C | -0.76796 | 1.26030  | -0.29956 |
| C | 0.05870  | 0.33529  | 0.55644  |
| C | 1.36469  | -0.08963 | 0.09952  |
| N | 2.40678  | -0.41384 | -0.26133 |
| N | -1.08783 | -0.34203 | 0.02136  |
| C | -1.87696 | -1.26643 | -0.15910 |
| H | -0.47360 | 1.42373  | -1.32241 |
| H | -1.44779 | 1.93825  | 0.18854  |
| H | 0.01791  | 0.49193  | 1.62986  |

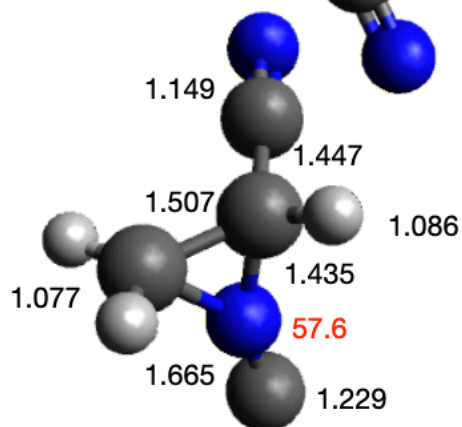

TS13

|   |          |          |          |
|---|----------|----------|----------|
| C | -0.51734 | 0.40269  | -0.13548 |
| C | 0.46786  | -0.47751 | 0.15305  |
| C | 1.83276  | -0.13995 | 0.00449  |
| N | 2.95228  | 0.11461  | -0.10898 |
| N | -1.83943 | 0.04378  | -0.07338 |
| C | -2.98064 | -0.21976 | -0.04924 |
| H | -0.31529 | 1.35589  | -0.60326 |
| H | -0.52284 | 1.60355  | 1.50664  |
| H | 0.23244  | -1.46092 | 0.53625  |

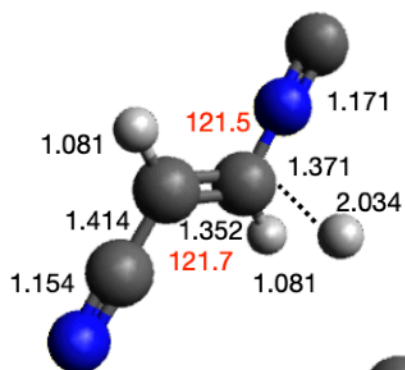

TS14

|   |          |          |          |
|---|----------|----------|----------|
| C | 0.13674  | 1.72165  | -0.11892 |
| C | 0.06230  | 0.38240  | 0.08513  |
| H | -0.76446 | 2.31278  | -0.15086 |
| H | 1.09586  | 2.21050  | -0.18741 |
| C | -1.19809 | -0.31391 | -0.00620 |
| N | -2.20968 | -0.85265 | -0.10074 |
| N | 1.19338  | -0.41777 | -0.00910 |
| C | 2.13678  | -1.10400 | -0.10027 |
| H | -0.04380 | 0.25278  | 1.94870  |

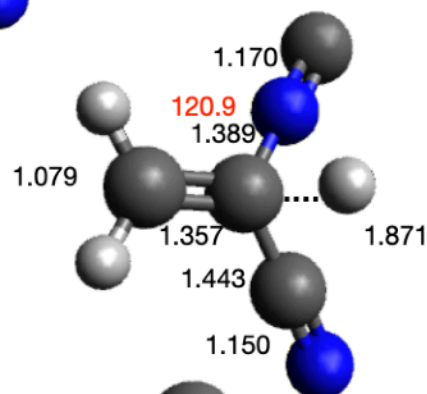

TS15

|   |          |          |          |
|---|----------|----------|----------|
| C | 0.74840  | 0.91610  | -0.09745 |
| C | -0.60065 | 1.01080  | -0.13625 |
| C | -1.48042 | -0.08741 | -0.00919 |
| N | -2.22738 | -0.96125 | 0.08787  |
| N | 1.41764  | -0.27764 | -0.04720 |
| C | 2.03415  | -1.27390 | -0.01724 |
| H | 1.36360  | 1.78217  | -0.29360 |
| H | 1.14110  | 1.50618  | 1.80881  |
| H | -1.04533 | 1.99047  | -0.23921 |

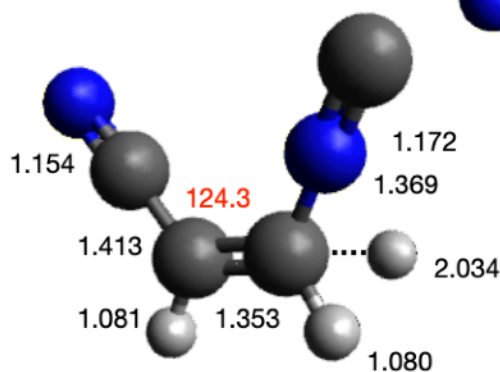

E-NC-CH=CH-NC

|   |          |          |          |
|---|----------|----------|----------|
| C | -0.52624 | 0.43323  | -0.00006 |
| C | 0.45068  | -0.48066 | -0.00006 |
| C | 1.82000  | -0.10828 | -0.00004 |
| N | 2.93973  | 0.16505  | 0.00008  |
| N | -1.84984 | 0.09213  | 0.00001  |
| C | -2.99957 | -0.13721 | 0.00006  |
| H | -0.32123 | 1.49527  | -0.00009 |
| H | 0.22274  | -1.53805 | -0.00003 |

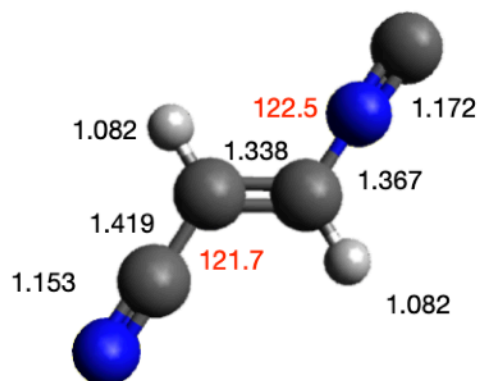



## Z-NC-CH=CH-NC

|   |          |          |          |
|---|----------|----------|----------|
| C | 0.74422  | 0.96647  | 0.00071  |
| C | -0.59250 | 1.03399  | -0.00061 |
| C | -1.45344 | -0.09337 | -0.00093 |
| N | -2.18540 | -0.98342 | 0.00086  |
| N | 1.45325  | -0.20021 | 0.00134  |
| C | 2.10936  | -1.17213 | -0.00147 |
| H | 1.34120  | 1.86789  | 0.00127  |
| H | -1.06196 | 2.00768  | -0.00285 |

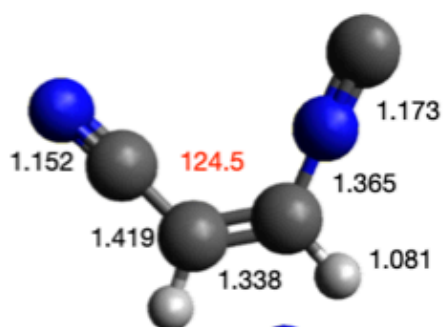CH<sub>2</sub>CCNNC

|   |          |          |         |
|---|----------|----------|---------|
| C | -0.13020 | 1.72720  | 0.00000 |
| C | -0.06264 | 0.39449  | 0.00000 |
| H | 0.77392  | 2.31532  | 0.00000 |
| H | -1.08483 | 2.23055  | 0.00000 |
| C | 1.19099  | -0.30466 | 0.00000 |
| N | 2.20149  | -0.85492 | 0.00000 |
| N | -1.18966 | -0.40397 | 0.00000 |
| C | -2.12680 | -1.10597 | 0.00000 |

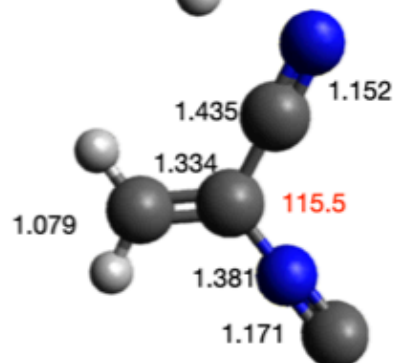

## TS-Abs

|   |          |          |          |
|---|----------|----------|----------|
| C | 0.01584  | 0.69996  | -0.00000 |
| C | 0.84068  | -0.33535 | -0.00002 |
| H | 0.27806  | 1.74940  | 0.00002  |
| H | -1.12786 | 0.49196  | -0.00002 |
| C | 2.25839  | -0.17525 | 0.00000  |
| H | 0.47012  | -1.35330 | -0.00004 |
| N | 3.40539  | -0.06715 | 0.00002  |
| C | -2.64857 | 0.07190  | -0.00003 |
| N | -3.75088 | -0.28365 | 0.00003  |

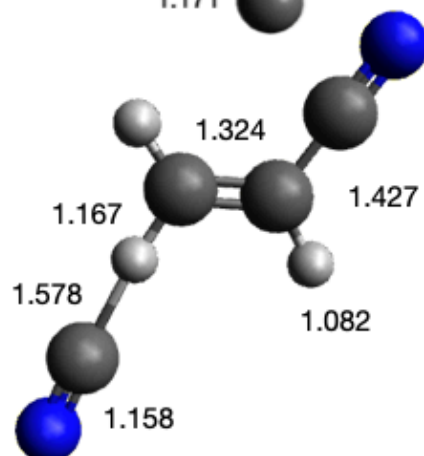

## TS-Mig

|   |          |          |          |
|---|----------|----------|----------|
| C | 0.45343  | 0.43810  | -0.07283 |
| C | -0.55301 | -0.50154 | 0.01560  |
| C | -1.90776 | -0.12789 | -0.00052 |
| N | -3.02669 | 0.16540  | -0.02342 |
| C | 1.85042  | 0.12868  | 0.01801  |
| N | 2.98349  | -0.18463 | -0.09185 |
| H | 0.22622  | 1.48301  | -0.23939 |
| H | 1.33942  | 0.57973  | 1.16398  |
| H | -0.32179 | -1.55219 | 0.12067  |

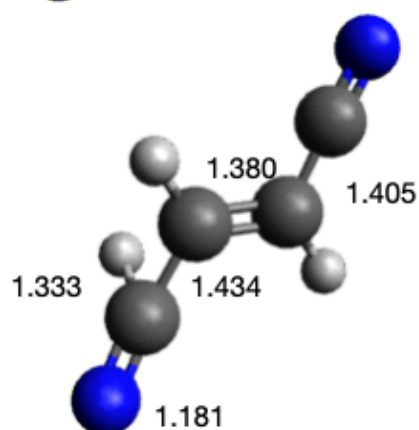

Supplement: jp2c01802_si_001.pdf [file jp2c01802_si_001.pdf]
